# Supplementary material for: Training second-grade dyslexic students using a computerized program in Asyut, Egypt
Source: Springer Nature journal article supplement (doi:10.1186/s41983-022-00480-y), 2022-05-12
Supplement: MOESM1 [file 25672032]

المشروعات البحثية الميدانية  
ووبائيات الأمراض العصبية  
مشروع صعوبات التعلم  
رئيس المشروع أ.د / وفاء محمد فرغلي  
أستاذ أمراض المخ والأعصاب بكلية الطب

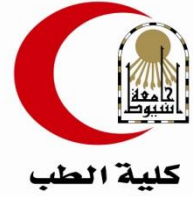

## اختبار تحصيلي في اللغة العربية ( القراءة ) للفيف الثاني الإبتدائي

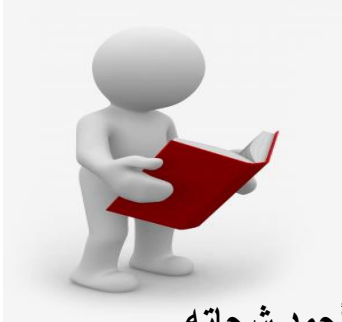

إعداد  
أ.د/ منتصر صلاح عمر سليمان  
أستاذ علم النفس المساعد  
كلية التربية – جامعة أسيوط

### الفريق البحثي

- أ.د/ محمد شعبان فرغلي أحمد  
أستاذ علم النفس المساعد  
كلية التربية – جامعة أسيوط
- أ.د/ غيداء أحمد شحاته  
أستاذ الأمراض العصبية  
كلية الطب – جامعة أسيوط
- د/ عمرو سيد رمضان حسن  
دكتوراه علم النفس  
كلية التربية – جامعة أسيوط
- د/ محمد عبد الحميد  
مدرس الأمراض العصبية  
كلية الطب – جامعة أسيوط
- د/ خالد أوسامة محمد  
مدرس الأمراض العصبية  
كلية الطب – جامعة أسيوط
- د/ أمل محمد تهامي  
مدرس الأمراض العصبية  
كلية الطب – جامعة أسيوط

اسم التلميذ / .....

السن / .....

المدرسة / .....

الصف الدراسي / .....

تاريخ تطبيق الاختبار / .....

الدرجة الكلية 40 درجة  
درجة الطالب / الطالبة : .....

## س1 من موضوع اعرف جسمك ، اقرأ ثم أجب :

أنا أحافظ على جسمي . أغسل جسمي بالماء والصابون . أنظف أسناني بالفرشاة . أبي يقول :  
العقل السليم في الجسم السليم .

### (1) اختر الإجابة الصحيحة مما بين القوسين فيما يأتي :

- 1- جمع "جسم" ..... ( جسمان - جسيمات - أجسام )
- 2- مفرد "أسنان" ..... (سنون - سنتان - سنة )
- 3- مضاد "السليم" ..... (الخفيفة -المريض - الخشن )
- 4- لماذا تحافظ على جسمك؟

- لان العقل السليم فى الجسم السليم  
- حتى يزداد وزنى .  
- حتى أصاب بالأمراض.

## س2: أقرأ ثم أجب :-

" تنتقل النحلة فوق الزرع وبين الشجر ، النحلة تمتص الرحيق وتعطى العسل ، عسل النحل  
غذاء وشفاء "

### تخير الصواب مما بين القوسين فيما ياتى :

- 1- معنى " تمتص" ..... (تأخذ -ترفع - تلعب )
- 2- مضاد " فوق" ..... ( وراء - تحت - أعلى )
- 3- النحلة تمتص الرحيق وتعطى ..... ( السكر - العسل - الغذاء )
- 4- النحلة من الحشرات ..... ( الضارة- النافعة - الزاحفة )

## س3: من نص "يا ربنا سبحانك " اقرأ ثم أجب

لخدمة الإنسان  
من ساحة الكرم

ياخالق الأكوان  
أعطيته النعم

- 1- معنى "خالق" ..... ( رازق - صانع - واهب )
- 2- مفرد " الأكوان" ..... ( الكون - الكونات - الكوكب )
- 3- جمع "نعمة" ..... ( نعم - أنعام - نعام )
- 4- مضاد " الكرم" ..... ( الشبع - الخيانة - البخل )
- 5- أعطى الله الإنسان نعماً ..... ( كثيرة - قليلة )

## 6- لماذا خلق الله الكون .....

- لتعب الإنسان
- لخدمة الإنسان
- للعب واللهو

## س4 اختر الإجابة الصحيحة مما بين القوسين :-

- |                                 |                               |
|---------------------------------|-------------------------------|
| 1- لن تذهب إلى النادى .....     | ( أسلوب نفى – أسلوب استفهام ) |
| 2- جحا رجل ظريف .....           | ( جملة أسمية – جملة فعلية )   |
| 3- ولد شجاع .....               | ( هذا – هذه )                 |
| 4- تساعد أمها .....             | ( هى – هو )                   |
| 5- عمال الحديقة .....           | ( هذا – هؤلاء )               |
| 6- الكلمة التى بها حرف مد ..... | ( سعد – سعيد )                |
| 7- الكلمة التى بها حرف مد ..... | ( سماء – قمر )                |
| 8- أحب ..... يذاكر دروسه        | ( الذى – التى )               |
| 9- ..... نزين الفصل             | ( هما – نحن )                 |
| 10- أنا ..... مع زملائى         | ( نلعب – ألعب )               |
| 12- ..... شجرتان مثمرتان        | ( هاتان – هذان )              |
| 13- الولد كلمة بها لام .....    | ( شمسية – قمرية )             |
| 14- الشجرة كلمة بها لام .....   | ( شمسية – قمرية )             |

## س5 رتب الكلمات لتكون جملاً :-

- 1- النحل — الذهب - لون - مثل
- 2- جحا - ظهر - ركب - حماره - فوق
- 3- فى - قفز - البحيرة - الأطفال
- 4- الطفل - الأمير - على - شكر - شجاعته
- 5- الأمراض - العسل - من - يشفى
- 6- العصفور - الشجرة - فوق - يقف
- 7- بين - تطير - النحلة - الأزهار

س7 صل من العمود ( أ ) بما يناسبه من العمود ( ب ) :

**العمود (أ)**

مد بالألف

أسلوب نداء

مد بالواو

اسم إشارة

أسلوب أمر

**العمود (ب)**

عصفور

اكتب الدرس

هذا

يا محمد هيا نلعب

صابر
